# Supplementary material for: Multicolor tunability and upconversion enhancement of fluoride nanoparticles by oxygen dopant
Source: Royal Society of Chemistry journal article supplement (doi:10.1039/c3nr01612a), 2013-01-01
Supplement: c3nr01612a.pdf [file c3nr01612a.pdf]

*Supplementary Information:*

## **Multicolor Tunability and Upconversion Enhancement of Fluoride Nanoparticles by Oxygen Dopant**

Wenbin Niu, Suli Wu, Shufen Zhang,\* Liap Tat Su and Alfred Iing Yoong Tok

**Selection of Oxygen Source.** Generally, there are several kinds of oxygen sources, including peroxy-acid, oxygen gas, metal oxide, and organic nitrogen oxide and nitrates. Because it is explosive at high temperature, peroxy-acid could not be used as the oxygen sources in the present system. The addition of metal oxide could pollute the inorganic NaGdF<sub>4</sub>:Yb, Er UCNPs. Although oxygen gas was widely used as oxygen source, it is difficult to control the amount of oxygen in the present reaction system. Therefore, organic nitrogen oxides and nitrates with the relative high decomposition temperature were selected as oxygen sources. Among these organic nitrogen oxides and nitrates, ammonium nitrate (NH<sub>4</sub>NO<sub>3</sub>) is very cheap, and can decompose into nitrogen, oxygen and water when the temperature is higher than 230 °C (see below). This temperature is close to the thermolysis temperature of metal trifluoroacetate precursors (250 °C).

To examine the rationality of selecting NH<sub>4</sub>NO<sub>3</sub> as oxygen source, we investigated the effects of different organic nitrogen oxide on the upconversion luminescent properties. Trimethylamine *N*-oxide and ammonium carbonate were selected as oxygen sources for comparing with NH<sub>4</sub>NO<sub>3</sub>, because they were used as oxygen transfer reagent. The control experiments showed that Yb, Er codoped fluoride UCNPs exhibited strong red emission of <sup>4</sup>F<sub>9/2</sub>→<sup>4</sup>I<sub>15/2</sub> transition, and the green emission band almost disappeared after addition of NH<sub>4</sub>NO<sub>3</sub> (Fig. S1). While trimethylamine *N*-oxide and ammonium carbonate were used as oxygen sources, the strong green emission of <sup>4</sup>H<sub>11/2</sub>, <sup>4</sup>S<sub>3/2</sub>→<sup>4</sup>I<sub>15/2</sub> transitions were shown. These results indicate that trimethylamine *N*-oxide and ammonium carbonate could not effectively manipulate the color output of Yb, Er codoped fluoride UCNPs. This may be due to the low oxygen atom content in trimethylamine *N*-oxide. There is no enough oxygen atom was formed after decomposition. And ammonium carbonate can be decomposed into CO<sub>2</sub> at low temperature, which may also not provide the oxygen atom to diffuse into the host matrix of fluoride UCNPs. The above results

revealed that the addition of  $\text{NH}_4\text{NO}_3$  can effectively manipulate the color output of Yb, Er doped fluoride UCNPs, and it is rational to use  $\text{NH}_4\text{NO}_3$  as oxygen source.

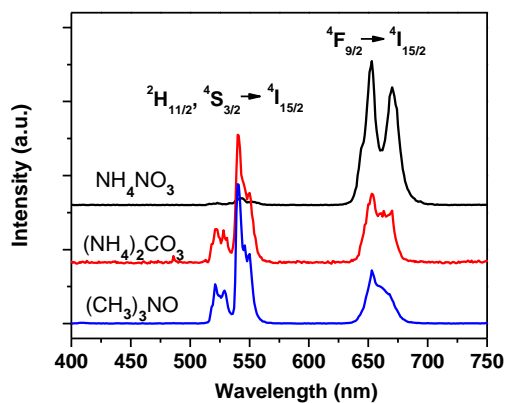

**Fig. S1** Upconversion spectra of  $\text{NaYF}_4$ :Yb, Er UCNPs prepared with various oxygen sources (300 °C, 1h,  $\text{NaYF}_4$ :Yb,Er 2 mmol). All of the UCNPs were excited at 980 nm with a 260 mW diode laser.

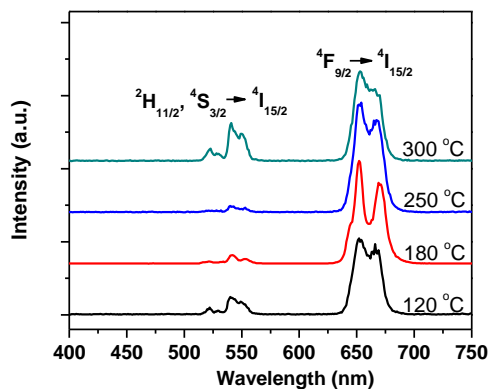

**Fig. S2** Effect of addition temperature of  $\text{NH}_4\text{NO}_3$  on the upconversion spectra of  $\text{NaYF}_4$ :Yb,Er UCNPs ( $\text{NH}_4\text{NO}_3$  20 mg per 2 mmol, 300 °C, 1h). All of the UCNPs were excited at 980 nm with a 260 mW diode laser.

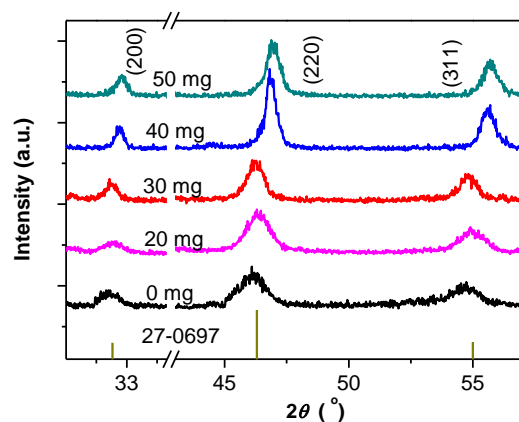

**Fig. S3** Enlarged XRD patterns of NaGdF<sub>4</sub>:Yb,Er UCNPs prepared with various amount of NH<sub>4</sub>NO<sub>3</sub>.

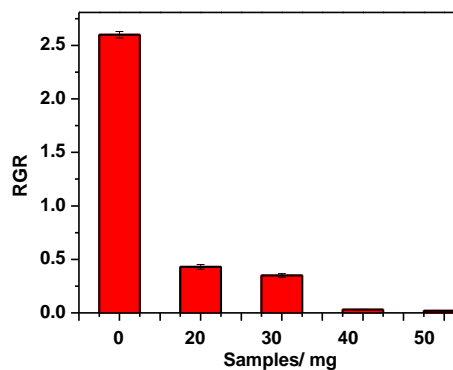

**Fig. S4** Intensity ratios of green to red emissions of NaGdF<sub>4</sub>: Yb,Er UCNPs prepared with various amounts of NH<sub>4</sub>NO<sub>3</sub> per 2 mmol.

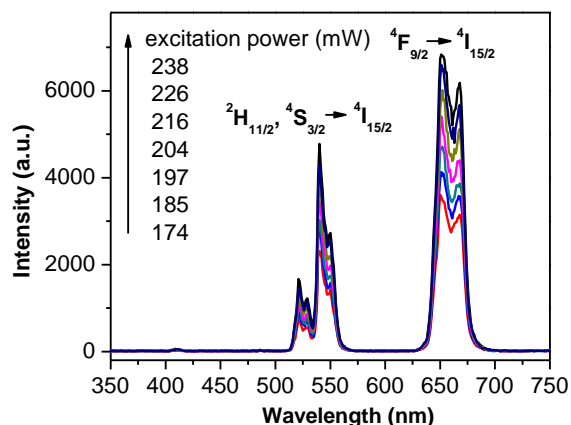

**Fig. S5** Power dependence of upconversion spectra of NaGdF<sub>4</sub>:Yb,Er UCNPs prepared at 300 °C for 1h, NH<sub>4</sub>NO<sub>3</sub> 20mg.

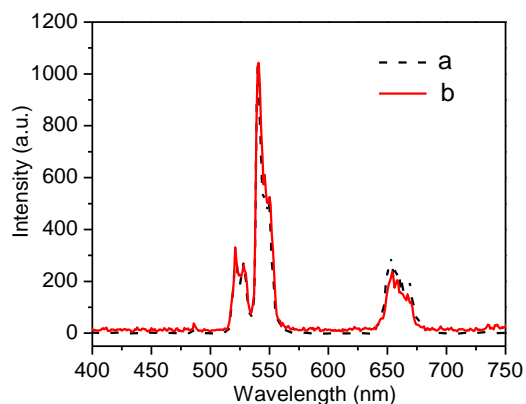

**Fig. S6** Upconversion spectra of NaYF<sub>4</sub>:Yb,Er UCNPs (2 mmol) with no addition of NH<sub>4</sub>NO<sub>3</sub> (a) and the product after further reaction between as-prepared NaYF<sub>4</sub>:Yb,Er and 50 mg of NH<sub>4</sub>NO<sub>3</sub> at 300 °C for 1 h (b).

NH<sub>4</sub>NO<sub>3</sub> and the prepared fluoride UCNPs with no oxygen impurities were added into reaction solution and reacted for 1 h at 300 °C, the results showed that the product was still in high green emission compared to the sample without addition of NH<sub>4</sub>NO<sub>3</sub>, implying that it is difficult to diffuse oxygen atom into host lattice of large-sized fluoride UCNPs.

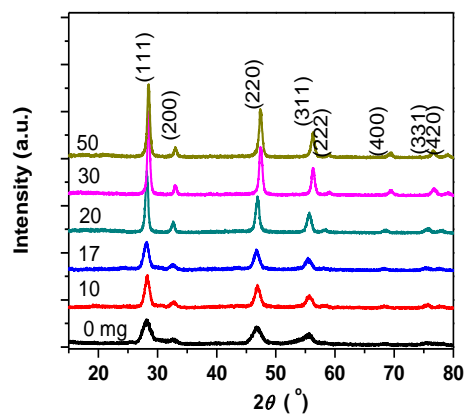

**Fig. S7** XRD patterns of NaYF<sub>4</sub>:Yb, Er UCNPs (2mmol) prepared with various amount of NH<sub>4</sub>NO<sub>3</sub>, 300 °C, 1h.

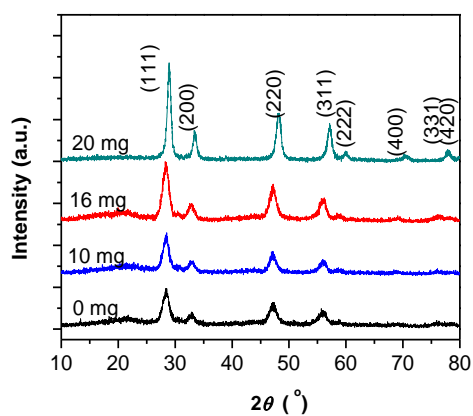

**Fig. S8** XRD patterns of NLuF<sub>4</sub>:Yb, Er UCNPs (2mmol) prepared with various amount of NH<sub>4</sub>NO<sub>3</sub>, 300 °C, 1h.

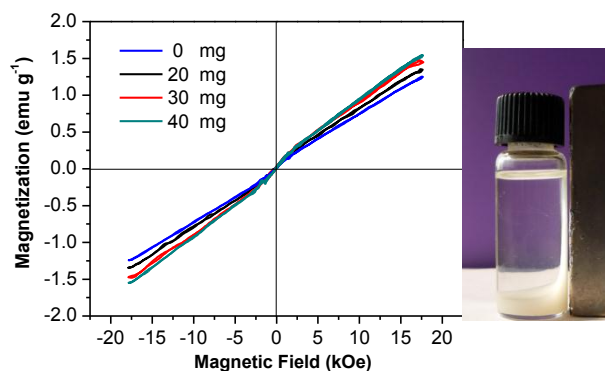

**Fig. S9** Magnetization curves of NaGdF<sub>4</sub>:Yb, Er UCNPs with various oxygen content.

**Magnetic properties.** Apart from upconversion luminescence, we also characterized the magnetic properties of the as-prepared NaGdF<sub>4</sub>:Yb, Er UCNPs. Fig. S9 shows the magnetization curves of NaGdF<sub>4</sub>:Yb, Er UCNPs with various oxygen contents. All the particles exhibit paramagnetism at room temperature. As oxygen contents increased, the magnetization of UCNPs increased from 1.25 to 1.5 emu/g at 20 kOe, which was close to the reported values of Gd-based nanoparticles<sup>1, 2</sup>. It is revealed those NaGdF<sub>4</sub>:Yb, Er UCNPs with multicolor output and proper paramagnetism can be further used for multi-mode applications.

#### REFERENCES:

1. Wang, Z. L.; Hao, J.; Chan, H. L. W. *J. Mater. Chem.* **2010**, *20*, 3178-3185.
2. Chen, D.; Yu, Y.; Huang, F.; Yang, A.; Wang, Y. *J. Mater. Chem.* **2011**, *21*, 6186-6192.
